# Supplementary material
Source: publisher figshare collection journal article supplement (https://karger.figshare.com/ndownloader/files/21846684)

**Saliva for assessing vitamin A status in extremely preterm infants: a diagnostic study**

Abhijeet A Rakshasbhuvankar1,2,3, Michael W Clarke4,5, Karen Simmer1,2, Sanjay K Patole1,2, J Jane Pillow2,3

1Neonatal Clinical Care Unit, King Edward Memorial and Perth Children’s Hospitals, Perth, Western Australia, Australia

2The UWA Centre for Child Health Research, Telethon Kids Institute, Perth, Western Australia, Australia

3School of Human Sciences, University of Western Australia, Perth, Australia

4Metabolomics Australia, Centre for Microscopy, Characterisation, and Analysis, The University of Western Australia, Perth, WA, Australia.

5School of Biomedical Sciences, Faculty of Health and Medical Sciences, The University of Western Australia, Perth, WA, Australia.

**Short title:** Salivary for vitamin A status assessment in preterm infants

**Corresponding author**

Abhijeet A Rakshasbhuvankar

Neonatal Clinical care Unit, King Edward Memorial Hospital, 374 Bagot Road, Subiaco, Western Australia, 6008, Australia

Email: [Abhijeet.Rakshasbhuvankar@health.wa.gov.au](mailto:Abhijeet.Rakshasbhuvankar@health.wa.gov.au)

Phone: +61 8 64581260, Fax: +61 8 64581266

**Supplementary Figure 1** Bland-Altman plot to assess the agreement of saliva and plasma (gold-standard) retinol levels.


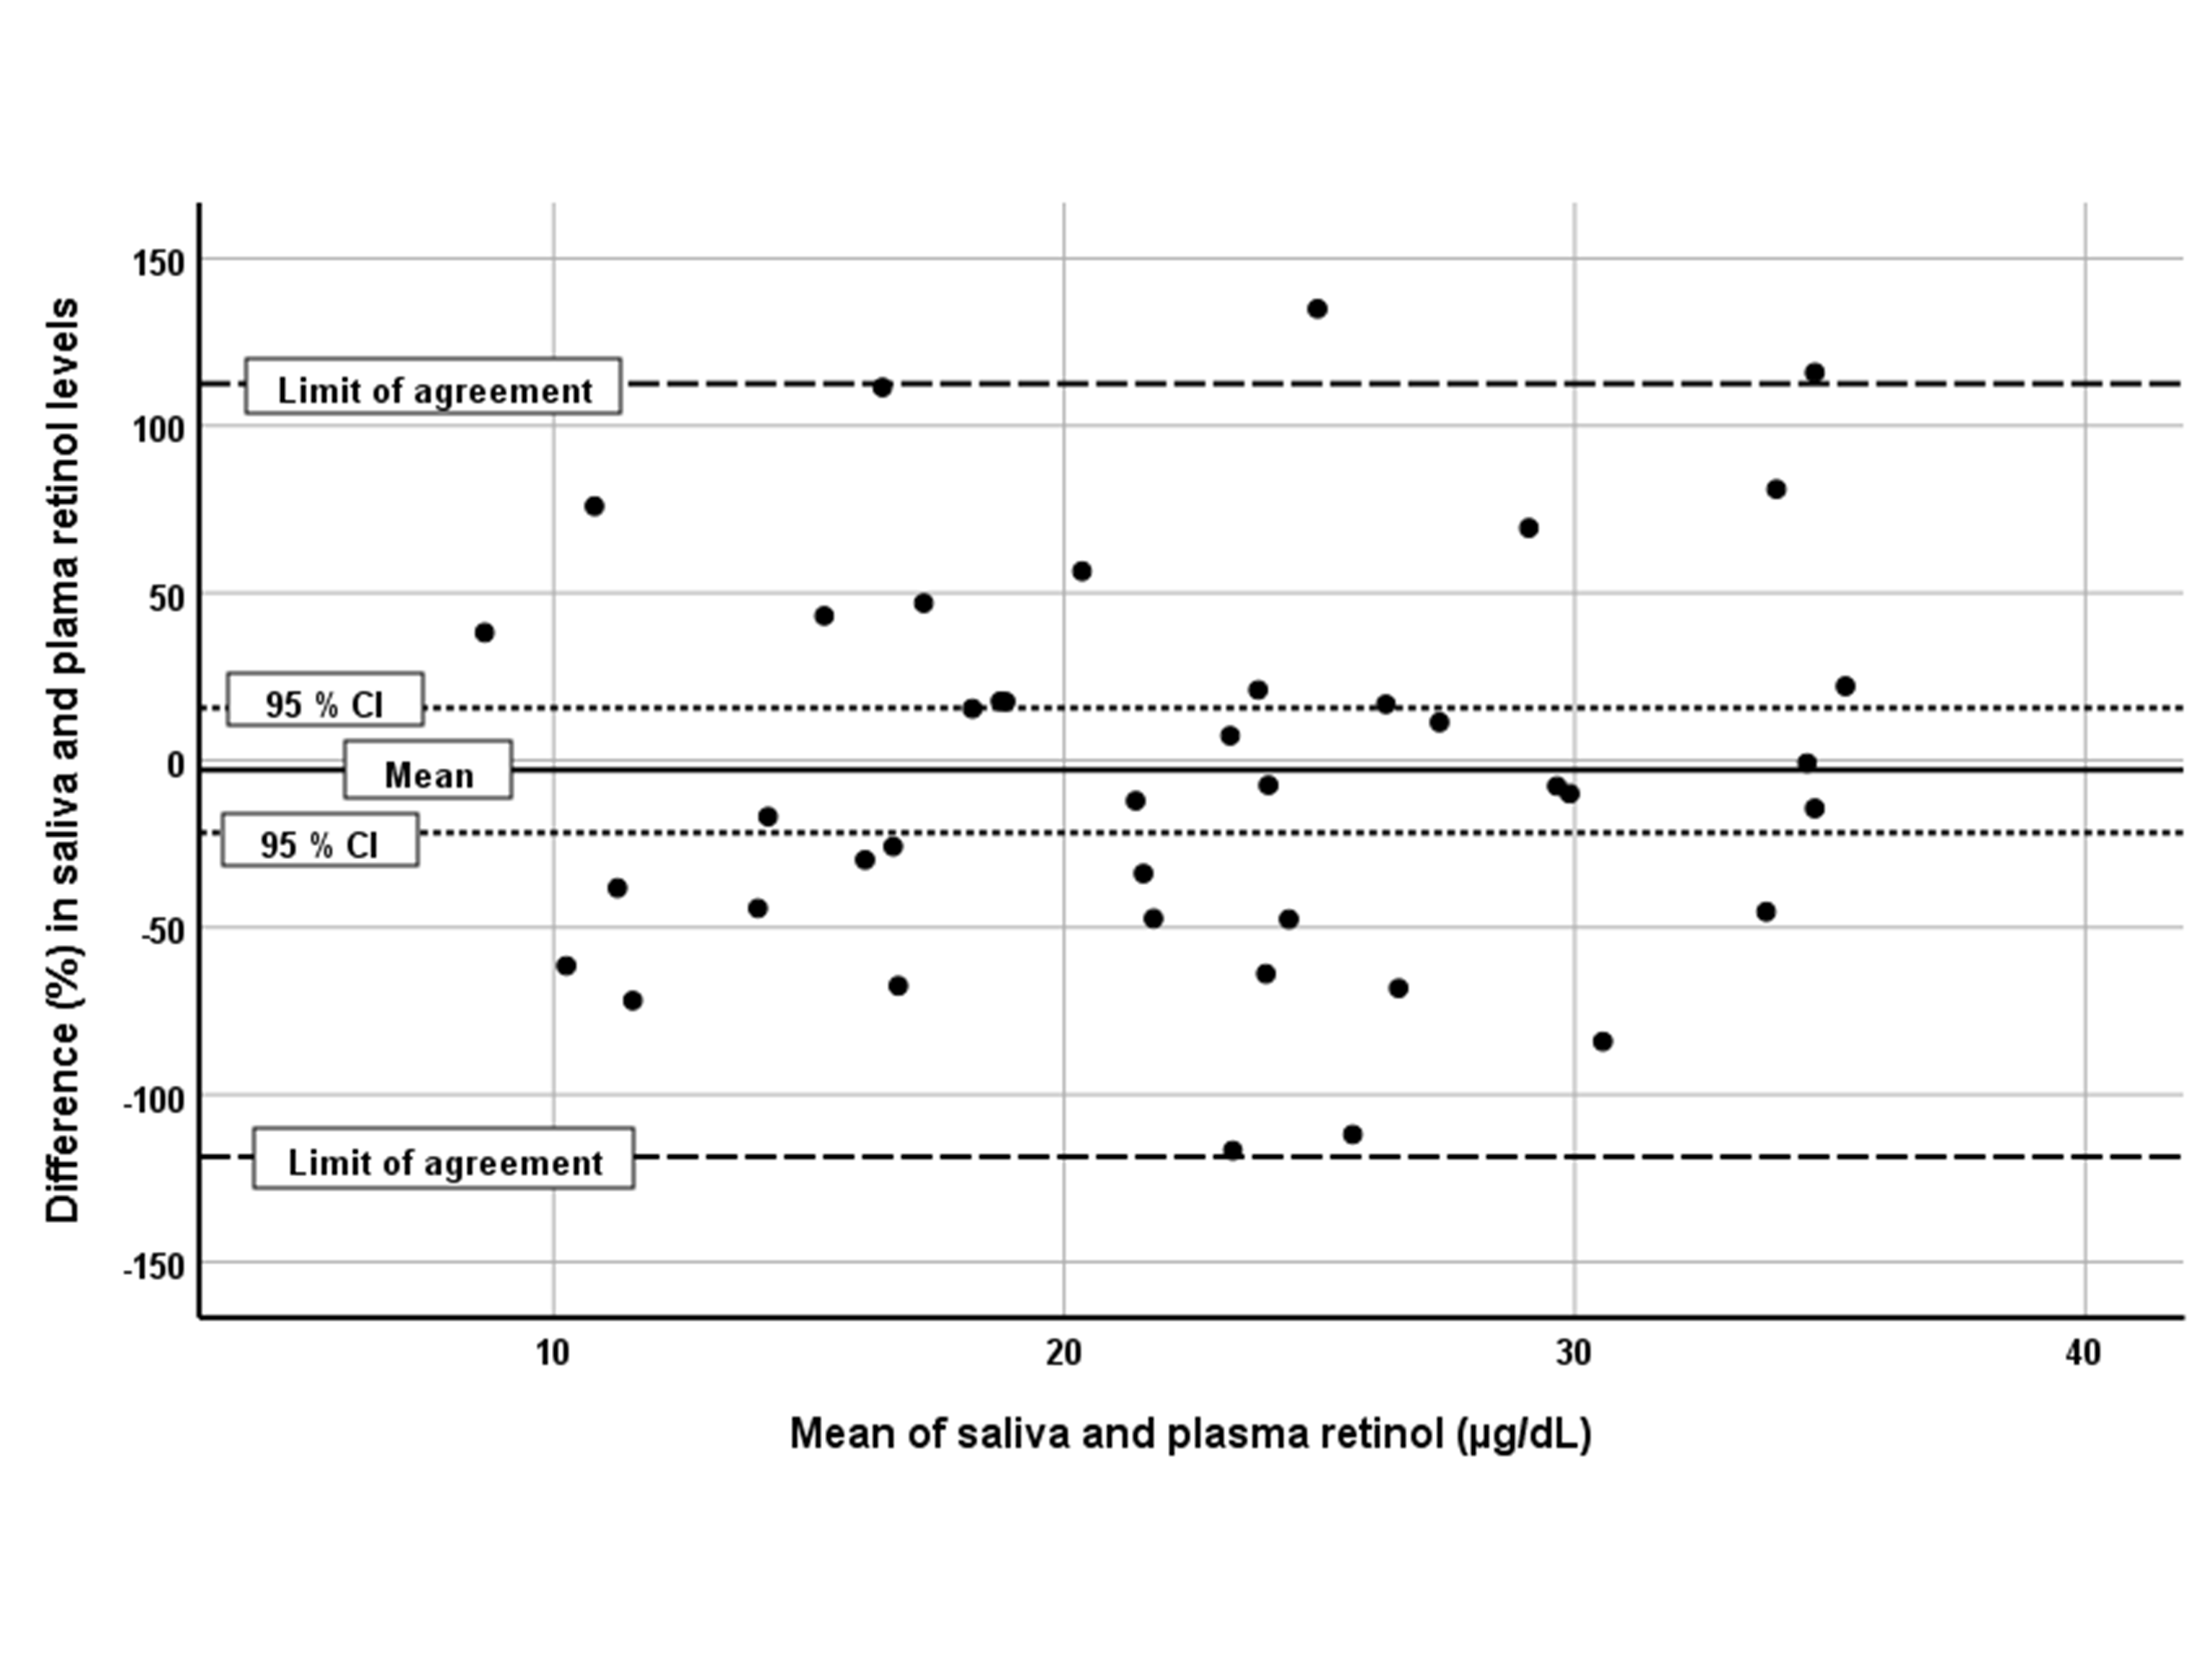

Supplement: Supplementary file 1 [file 21846684]
